# Supplementary material
Source: MDPI journal article supplement (https://www.mdpi.com/2073-4433/13/2/304)
Supplement: s1 [file s1 › atmosphere-1561835-supplementary.pdf]

## Supplemental Materials

**Table S1.** Summary PM<sub>2.5</sub> statistics across all 4 monthly sampling days.

| Averaging Period | N      | Mean | Std Dev | Min | Max  |
|------------------|--------|------|---------|-----|------|
| All 4 Days       | 10,972 | 6.9  | 6.1     | 0.0 | 90.0 |
| February         | 3,104  | 6.9  | 4.4     | 1.0 | 50.0 |
| March            | 2,439  | 5.3  | 3.3     | 0.0 | 53.0 |
| April            | 3,313  | 6.8  | 9.2     | 0.0 | 90.0 |
| May              | 2,116  | 9.0  | 3.5     | 0.0 | 19.0 |

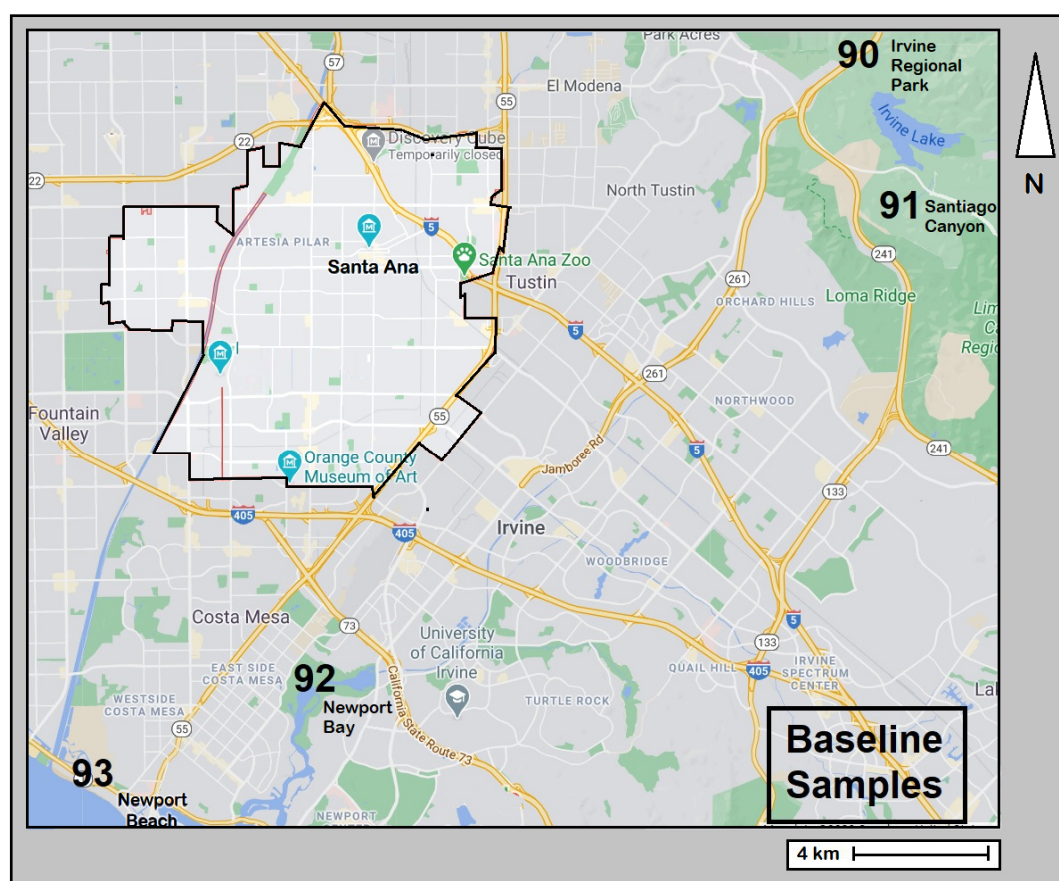

**Figure S1.** Locations of all four baseline sampling sites (#90-93) within Irvine Regional Park, Santiago Canyon, Newport Beach, and the Newport Bay relative to Santa Ana city boundary.

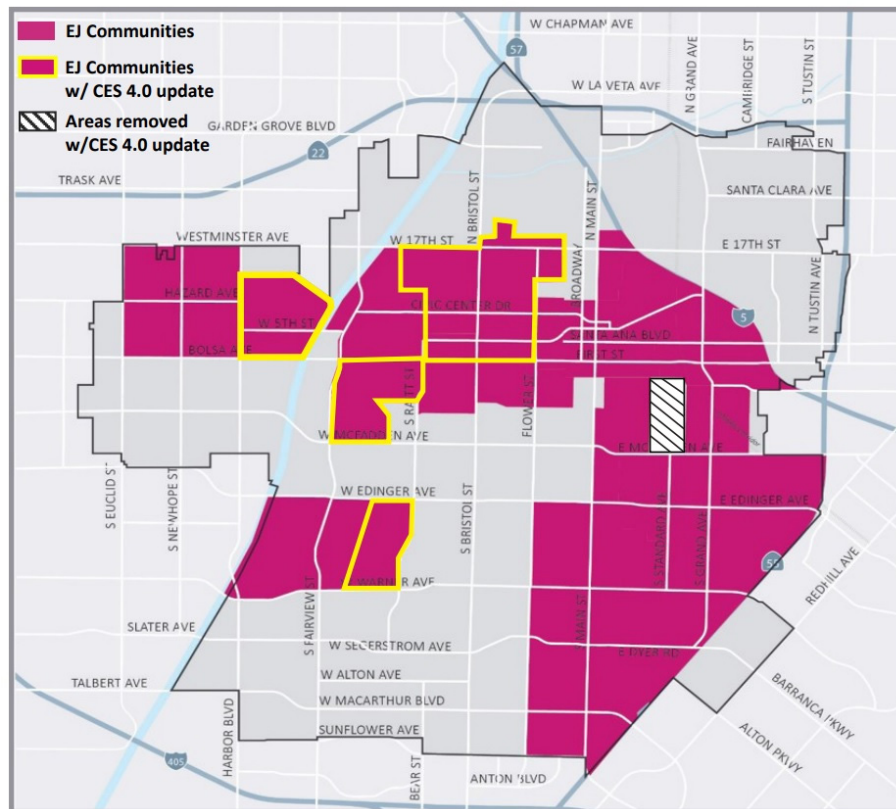

**Figure S2.** Locations of environmental justice communities within Santa Ana, CA, as of the 2021 updated designation.

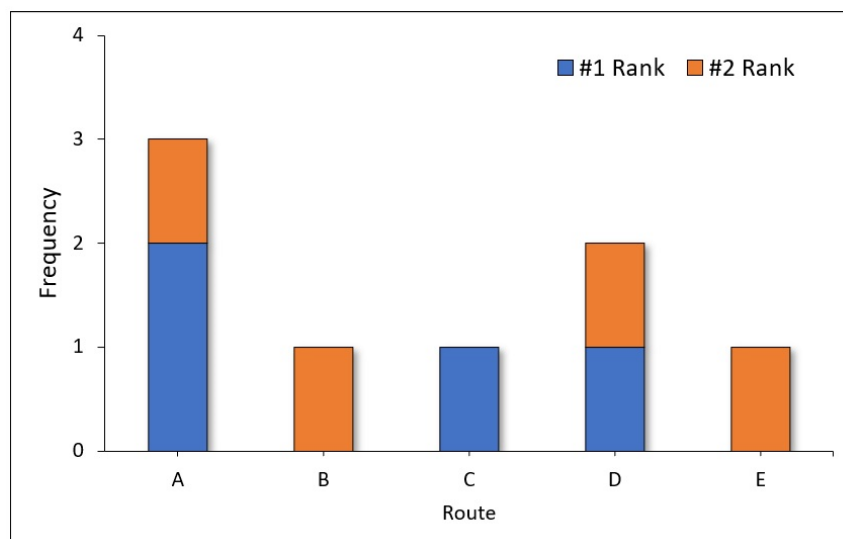

**Figure S3.** Number of times (frequency) that the monthly sampling day average  $PM_{2.5}$  concentration within a route was ranked either highest (#1 rank) or second highest (#2 rank) when compared to the other routes across the four sampling days.

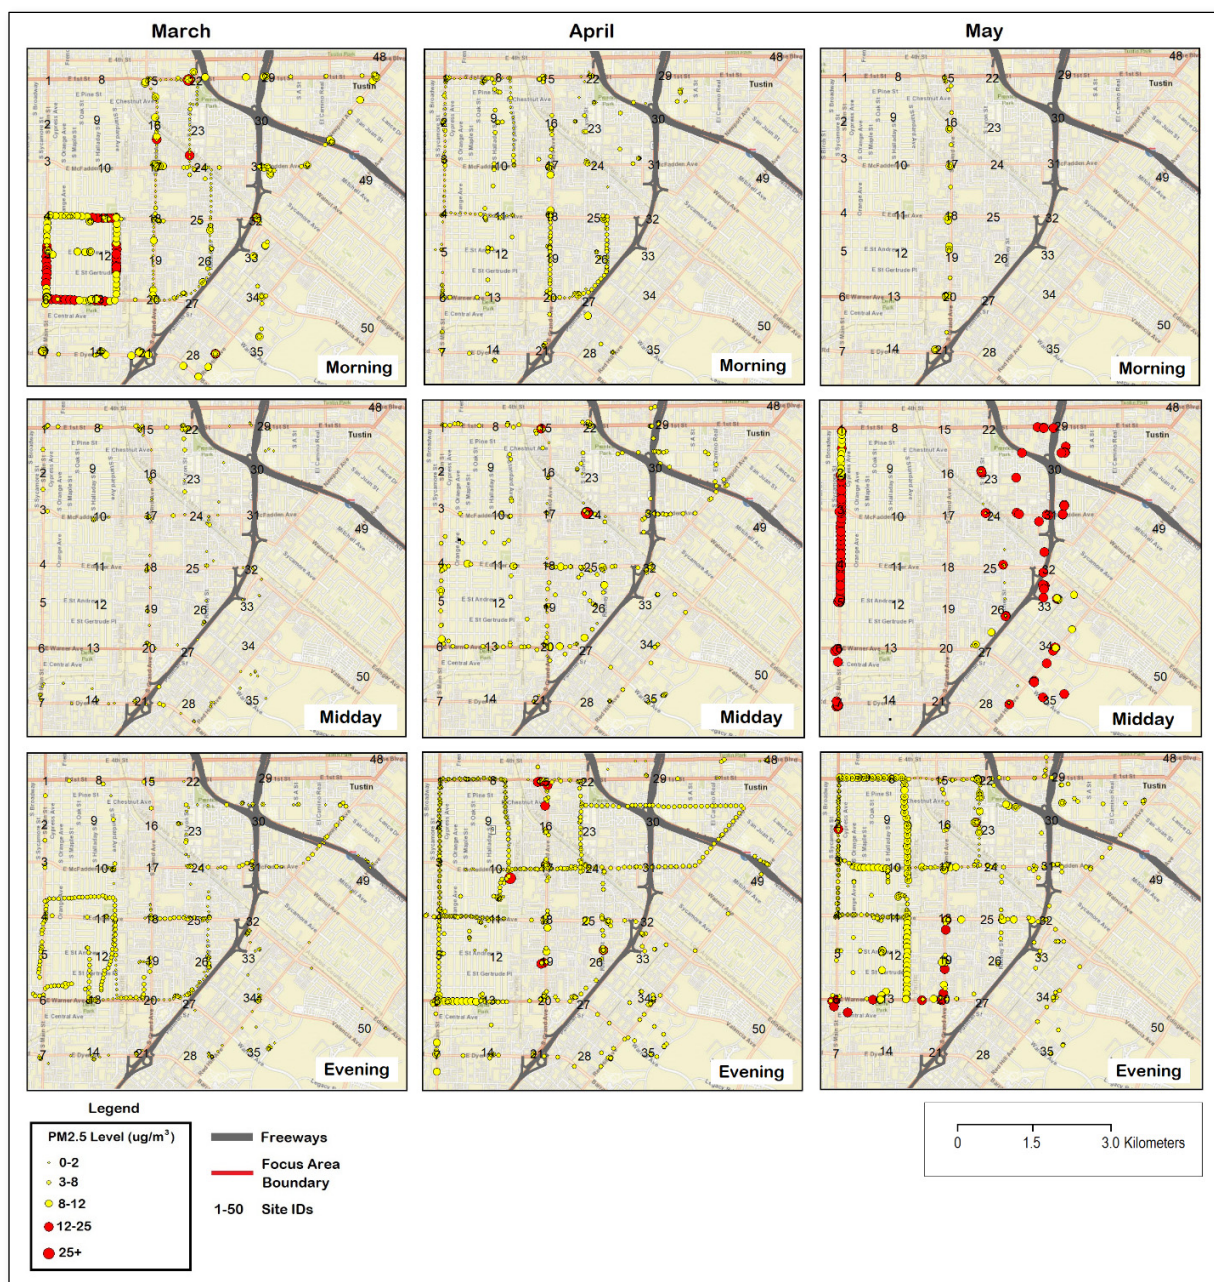

**Figure S4.** One-minute average  $\text{PM}_{2.5}$  measurements projected across the Focus Area in Santa Ana, broken down by morning, afternoon, and evening measurements for each monthly sampling day. A failed GPS device led to missing GPS coordinates in some areas for March and May.
